# Supplementary material for: Synthesis, In Silico, and Biological Applications of Novel Heteroleptic Copper (II) Complex of Natural Product-Based Semicarbazone Ligands
Source: Hindawi journal article supplement (doi:10.1155/2022/1497117), 2022-09-27
Supplement: f1 [file 1497117.f1.docx]

**Supplementary file**

**Synthesis, *In silico* and Biological Applications of novel Heteroleptic Copper (II) Complex of Natural product-based Semicarbazones ligands**

**Fekadu Muleta1⁎ and Tegene Desalegn2**

Adama Science and Technology University, College of applied natural science, Department of Applied Chemistry, Adama, Ethiopia

1. Institutional email: [fekadu.muleta@astu.edu.et](mailto:fekadu.muleta@astu.edu.et) and e-mail: [muletafikadu@gmail.com](mailto:muletafikadu@gmail.com)
2. Institutional email: [tegene.desalegn@astu.edu.et](mailto:tegene.desalegn@astu.edu.et) and email: [tegend@yahoo.com](mailto:tegend@yahoo.com)

* Corresponding author Fekadu Muleta, e-mail: [muletafikadu@gmail.com](mailto:muletafikadu@gmail.com), P.O.Box:1888

**No. Contents Page**

1. Figure S1: UV-Vis spectrum of L1 2

2. Figure S2: UV-Vis spectrum of L2 2

3. Figure S3: UV-Vis spectrum of Cu(L1)(L2) complex 3

4. Figure S4: X-ray diffraction pattern of Copper (II) complex 3

5. Figure S5: The 2D and 3D binding interactions of compound 1(L1) against Human

myeloperoxidase 4

6. Figure S6: The 2D and 3D binding interactions of compound 2(L2) against Human

myeloperoxidase 4

7. Figure S7: The 2D and 3D binding interactions of reference drug Ascorbic Acid against

Human myeloperoxidase 5

**
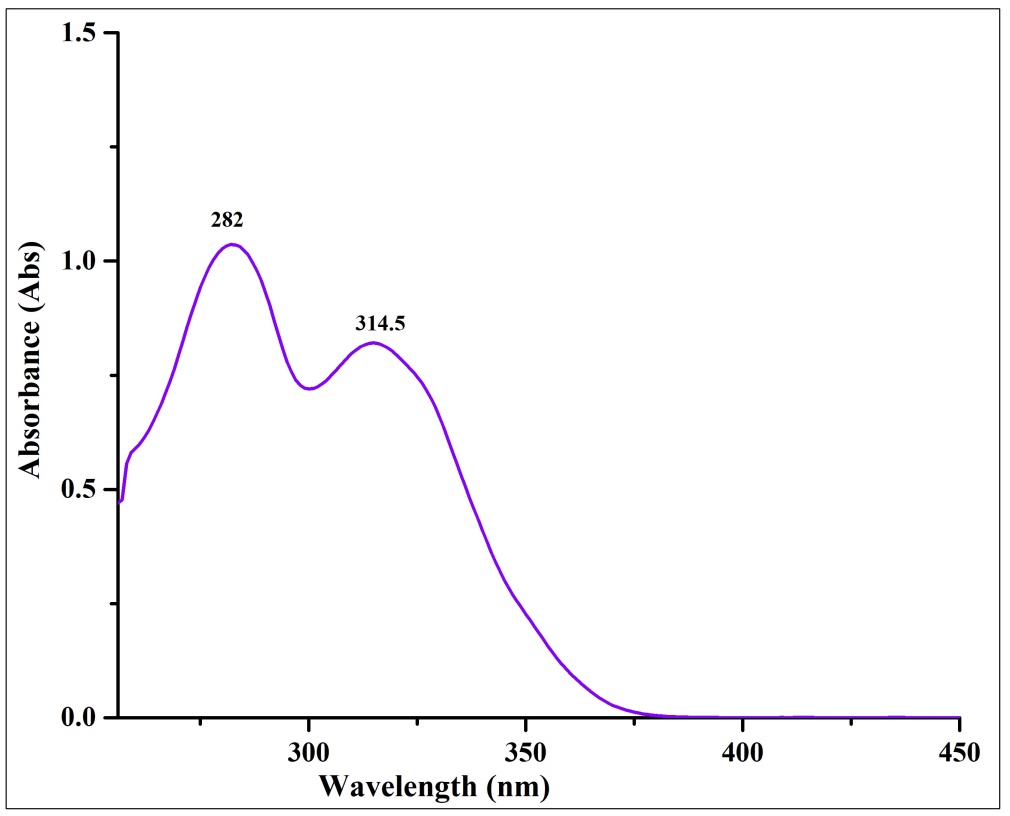
**

Figure S1: UV-Vis spectrum of L1


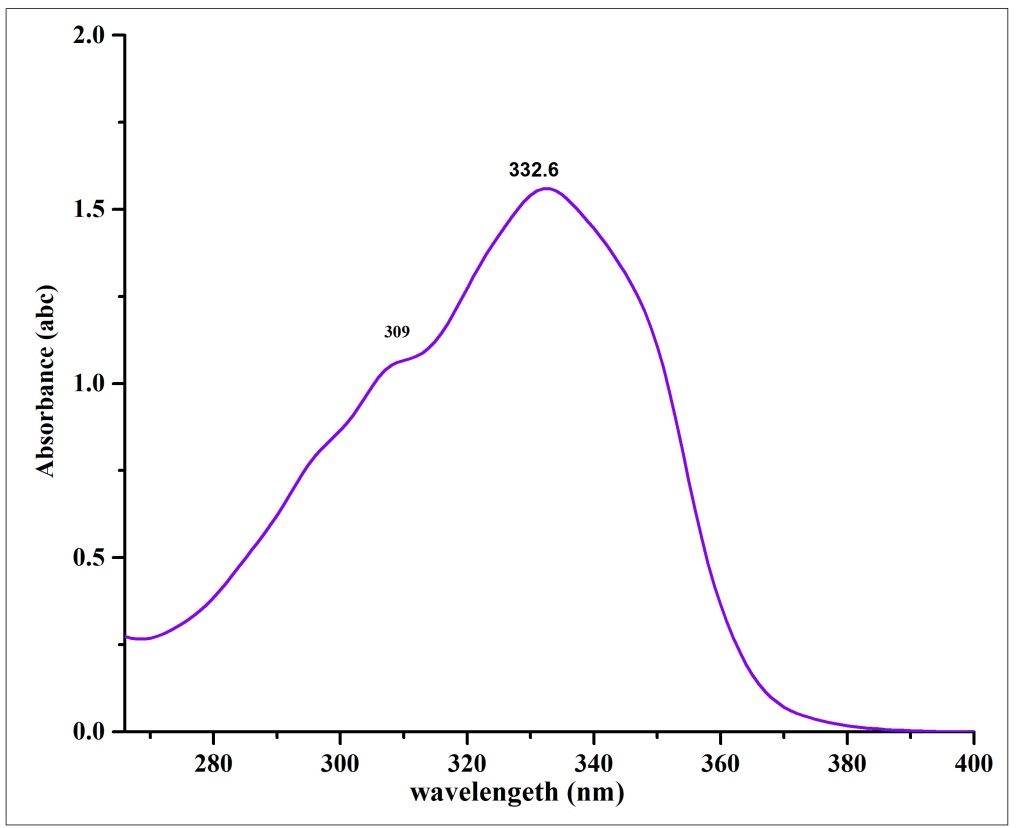


Figure S2: UV-Vis spectrum of L2

**
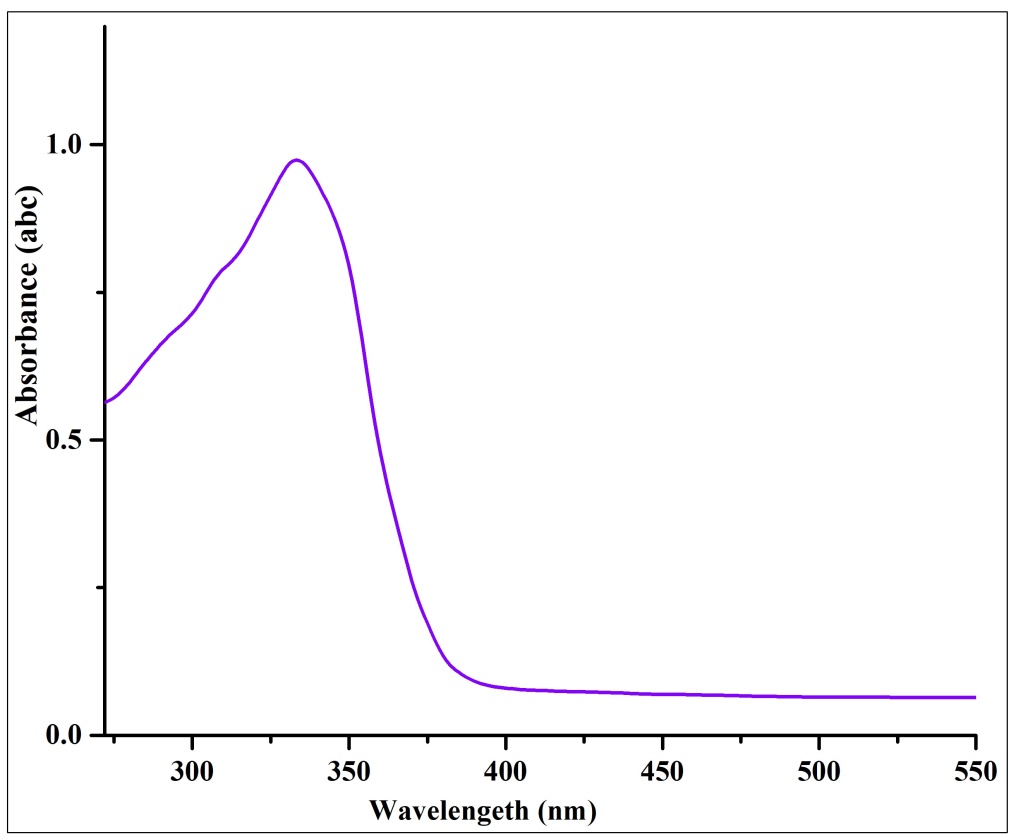
**

Figure S3: UV-Vis spectrum of Cu(L1)(L2) complex

**
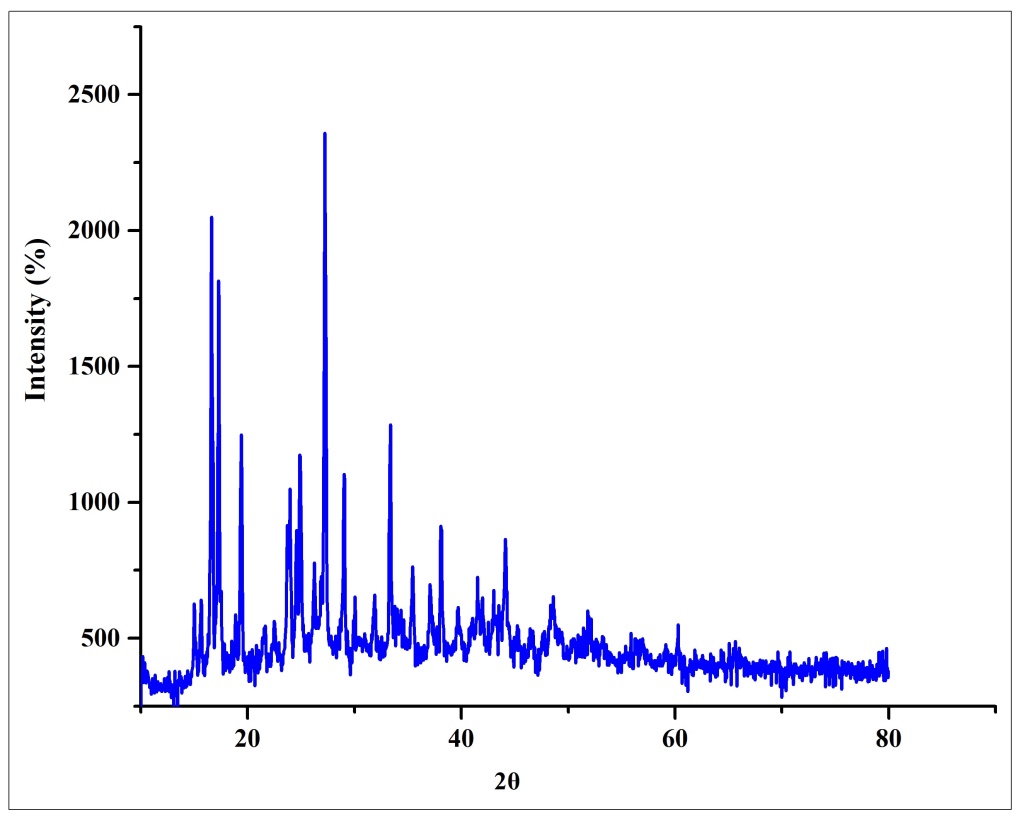
**

Figure S4: X-ray diffraction pattern of Copper (II) complex

**
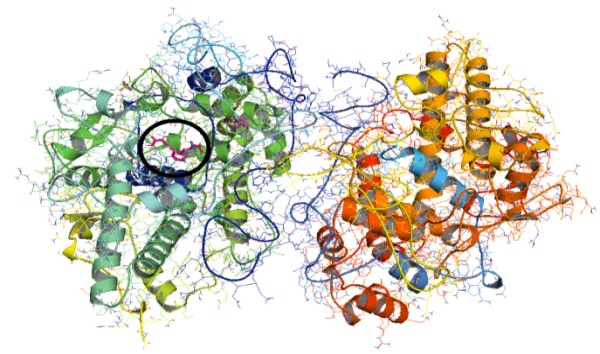

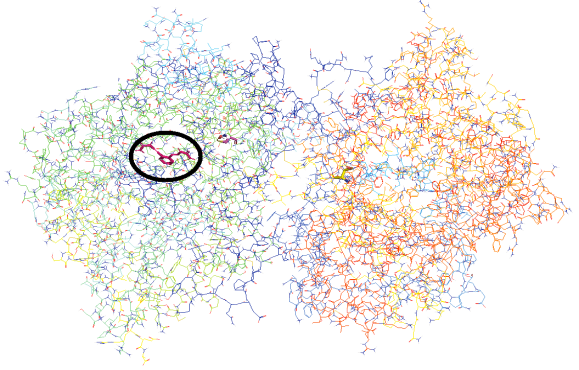
**

**
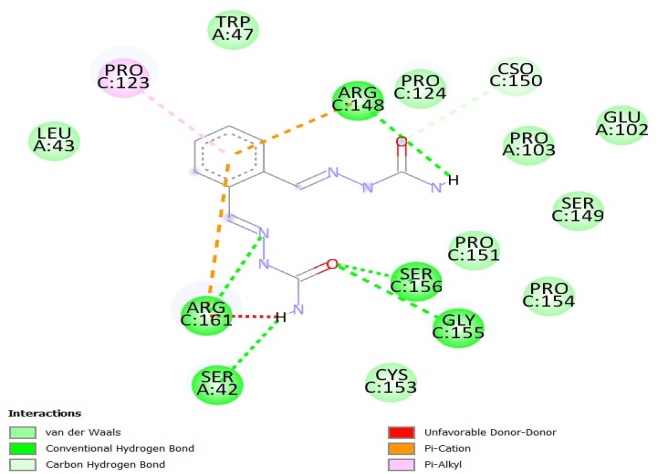

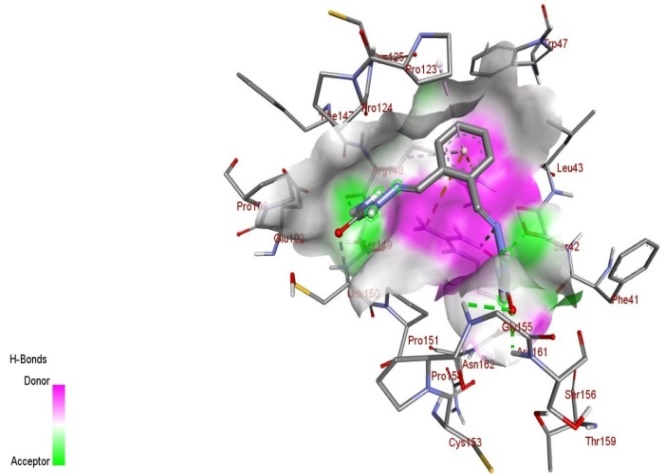
**


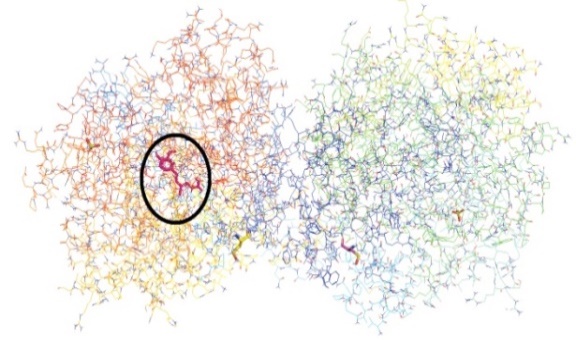

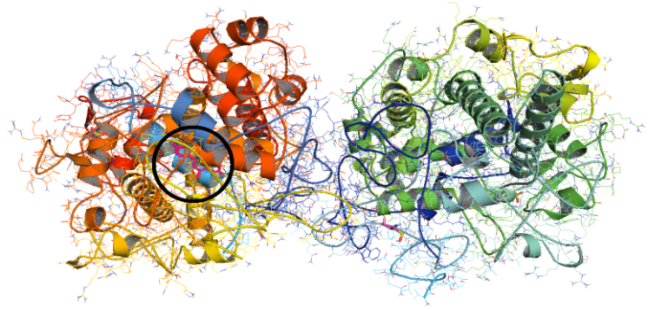
Figure S5:The 2D and 3D binding sites of compound **1**(L1) against Human myeloperoxidase


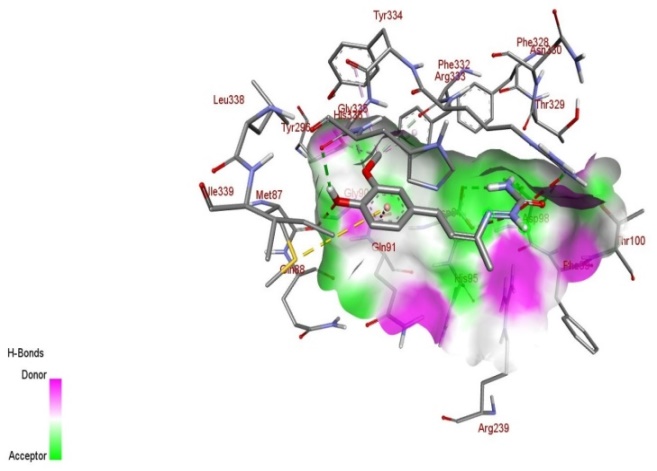


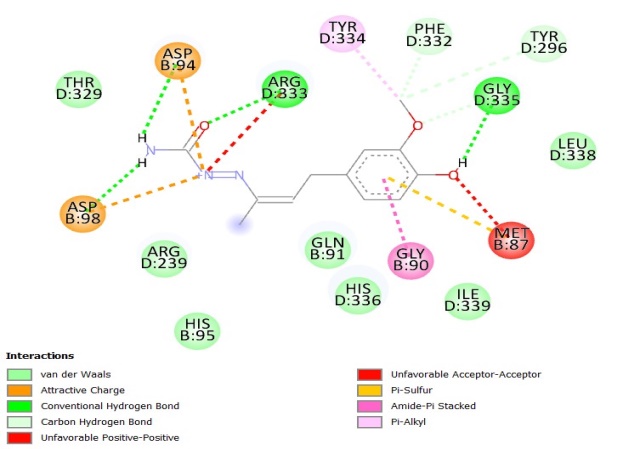


Figure S6: The 2D and 3D binding connections of compound **2**(L2) against Human myeloperoxidase

**
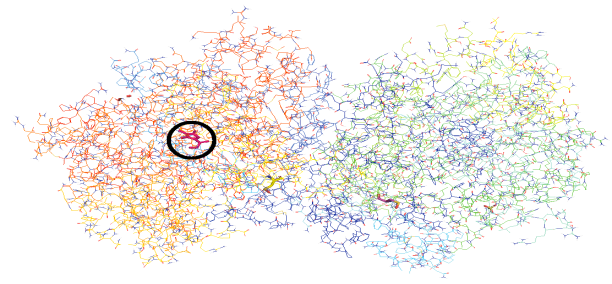
**
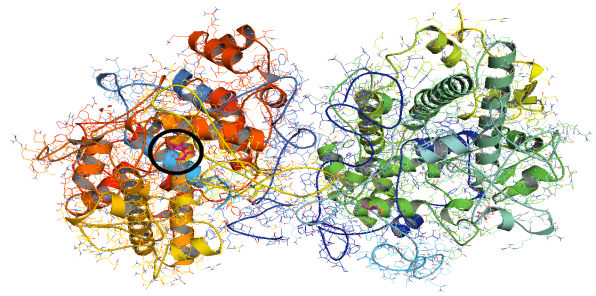


***
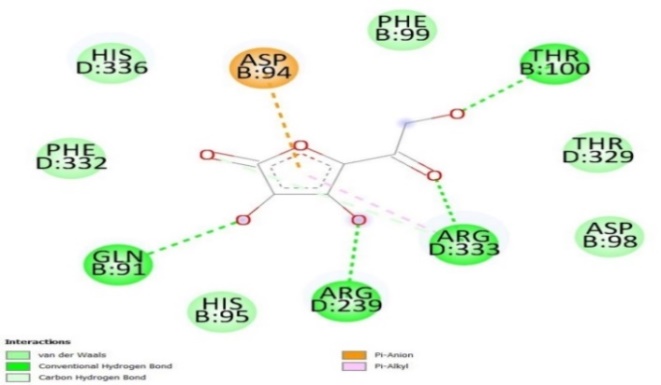

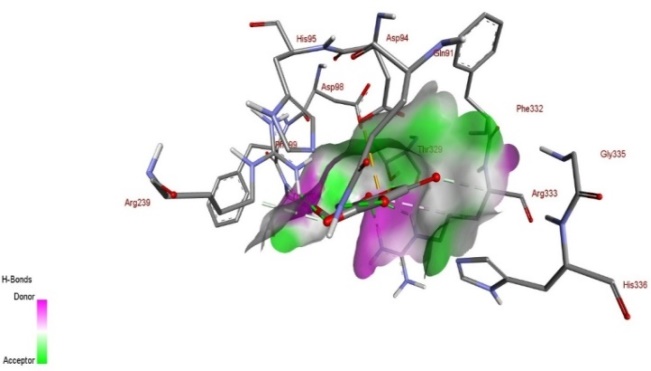
***

Figure S7: The 2D and 3D binding connections of reference drug Ascorbic Acid against Human myeloperoxidase
